# Supplementary material for: Structural and Biochemical Analysis of OrfG: The VirB8-like Component of the Conjugative Type IV Secretion System of ICESt3 From Streptococcus thermophilus
Source: PubMed Central journal article supplement (PMC8012802; doi:10.3389/fmolb.2021.642606), 2021-03-18
Supplement: datasheet1.pdf [file datasheet1.pdf]

**Table S1.** Strains, plasmids and oligonucleotides used in this project

| <b>Strains</b>                    |                                                                                                                                                                |                         |
|-----------------------------------|----------------------------------------------------------------------------------------------------------------------------------------------------------------|-------------------------|
| <b>Name</b>                       | <b>Genotype</b>                                                                                                                                                | <b>Source/reference</b> |
| <i>Streptococcus thermophilus</i> | LMG18311 ICESt3                                                                                                                                                | Laboratory collection   |
| DH5 $\alpha$                      | <i>F</i> -, $\Delta$ ( <i>argF-lacZ</i> )U169, <i>phoA</i> , <i>supE44</i> , $\Delta$ ( <i>lacZ</i> )M15, <i>relA</i> , <i>endA</i> , <i>thi</i> , <i>hsdR</i> | New England Biolabs     |
| BL21 (DE3)                        | <i>F</i> - <i>ompT gal dcm lon hsdSB(rB- mB-) <math>\lambda</math>(DE3)</i>                                                                                    | Invitrogen              |
| <b>Plasmids</b>                   |                                                                                                                                                                |                         |
| <b>Name</b>                       | <b>Description</b>                                                                                                                                             | <b>Source/reference</b> |
| pET28a-TRX                        | 6His-tag-TEV protease sequences inserted into pET28a+                                                                                                          | Laboratory collection   |
| pET28-TRX-OrfG <sub>64-331</sub>  | <i>orfG</i> <sub>64-331</sub> cloned in frame of 6His-TEV in pET28-TRX                                                                                         | This project            |
| pET28-TRX-OrfG <sub>64-204</sub>  | <i>orfG</i> <sub>64-204</sub> cloned in frame of 6His-TEV in pET28-TRX                                                                                         | This project            |
| pET28-TRX-OrfG <sub>64-215</sub>  | <i>orfG</i> <sub>64-215</sub> cloned in frame of 6His-TEV in pET28-TRX                                                                                         | This project            |
| pET28-TRX-OrfG <sub>223-331</sub> | <i>orfG</i> <sub>223-331</sub> cloned in frame of 6His-TEV in pET28-TRX                                                                                        | This project            |

| <b>Oligonucleotides</b>                                                                          |                                                       |
|--------------------------------------------------------------------------------------------------|-------------------------------------------------------|
| <b>For cloning in pET28-TRX*</b>                                                                 |                                                       |
| OrfG-BamHI-F                                                                                     | CCCCGGATCCGAGAACCTGTACTTCCAATCATCAAATAAAGTGGGAACACTAC |
| OrfG-HindIII-R                                                                                   | CCCCAAGCTTCTAATCTTTATCGTTTGCGTAG                      |
| OrfG <sub>c</sub> -BamHI-F                                                                       | CCCCGGATCCGAGAACCTGTACTTCCAATCAGCCAACGACCACGTCTCAG    |
| *Restrictions sites are underlined and TEV cleavage encoding sequence are highlighted in italics |                                                       |
| <b>Cloning by site directed mutagenesis (Stop codon insertion by PCR)*</b>                       |                                                       |
| OrfG <sub>64-204</sub> -Stop-F                                                                   | ACTTCCTTGGTTCTCAGCGTAAGAGTCTTACAAGCTGGATAC            |
| OrfG <sub>64-204</sub> -Stop-R                                                                   | GTATCCAGCTTGTGAAGACTCTTACGCTGAGAACCAAGGAAGT           |
| OrfG <sub>64-215</sub> -Stop-F                                                                   | AGCTGGATACTTTAGCGAATAGGATCAACTCCAACCTCACAG            |
| OrfG <sub>64-215</sub> -Stop-R                                                                   | CTGTGAGTTGGAGTTGATCCTATTCGCTAAAGTATCCAGCT             |
| * Mutagenized codons are underlined                                                              |                                                       |

**Tables S2.** Pairwise alignment lengths, identities and similarities between the 13 Gram-negative VirB8 and 4 Gram-positive VirB8-like proteins considered in this comparison (**Table S3a**). The sequences are derived from the structures, i.e. there might be missing residues (see protein description below) corresponding to unobserved regions in the electron density. Values are calculated from the alignment of the sequences corresponding to the overall superposition of the 17 structures, as performed by mTM-align (Dong *et al.*, 2018a). The TM-scores (Dong *et al.*, 2018b) and the pairwise rmsd (Å) calculated from the same overall superposition are also given (**Tables S3b and S3c**). Clusters that appear in the structural tree are coloured as in Fig.5 and numbered for their convenient description in the main text.

For each following PDB code, the source organism, the Uniprot code, the sequence that was used for the experiment (X-Ray or NMR), where appropriate the unobserved residues (which are therefore missing in the sequence) and the resulting coverage of the whole sequence are given hereafter.

- 2cc3: VirB8 from *Agrobacterium tumefaciens*; Uniprot: P17798; Crystallized sequence: 92-237; C-ter (232-237) unobserved in the electron density; Coverage 59%.
- 3ub1: TcpC from *Clostridium perfringens*; Uniprot: Q1PLH8; Crystallized sequence: 99-309, central domain as defined by authors: 104-231; loop  $\beta$ 2- $\beta$ 3 (190-192) unobserved in the electron density (coverage 35%).
- 3wz3: TraM from Plasmid R64; Uniprot Q9R2H2; Crystallized sequence: 91-230; C-ter (227-230) unobserved in the electron density (coverage 59%).
- 3wz4: IcmL/DotI from *Legionella pneumophila*; Uniprot: O54626; Crystallized sequence: 73-212; C-ter (209-212) unobserved in the electron density (coverage 64%).
- 4akz: VirB8 from *Brucella suis*; Uniprot: Q7CEG3; Crystallized sequence: 97-234 (coverage 57%).
- 4ec6: TraM from *Enterococcus faecalis*; Uniprot: Q8L1C7; Crystallized sequence: 190-322; N-ter (190-213) unobserved in the electron density (coverage 34%).
- 4jf8: TrwG from *Bartonella birtlesii*; Uniprot: D0AAZ5; Crystallized sequence: 63-232; N-ter (63-88) unobserved in the electron density (coverage 62%).
- 4kz1: VirB8 from *Bartonella grahamii*; Uniprot: C6AER9; Crystallized sequence: 51-222; N-ter (51-84) and C-ter (220-222) unobserved in the electron density; Coverage 61%.
- 4lso: VirB8 from *Bartonella quintana*; Uniprot: Q6FYW3; Crystallized sequence: 65-234; N-ter (65-93) unobserved in the electron density; Coverage 60%.
- 4mei: VirB8 from *Bartonella tribocurum*; Uniprot: A9IWN6; Crystallized sequence: 51-222; N-ter (51-84) and C-ter (221-222) unobserved in the electron density; Coverage 61%.
- 4nhf: VirB8 from *Bartonella grahamii*; Uniprot: C6AAT5; Crystallized sequence: 63-233; N-ter (63-88) and C-ter (233) unobserved in the electron density (coverage 61%).
- 4o3v: VirB8 from *Rickettsia typhi*; Uniprot: Q68X84; Crystallized sequence: 61-232; N-ter (61-89), loop  $\beta$ 3- $\beta$ 4 (208-209) and C-ter (232) unobserved in the electron density (coverage 60%).
- 5aiw: TraH/Orf8 from *Enterococcus faecalis*; Uniprot: Q9AL12; NMR sequence: 56-183 (coverage 69%).
- 5cnl: IcmL-like from *Legionella pneumophila*; Uniprot: Q5ZZ91; Crystallized sequence: 22-176; C-ter (162-176) unobserved in the electron density (coverage 79%).
- 5i97: TraE from *Escherichia coli*; Uniprot: Q17U16; Crystallized sequence: 70-232; N-ter (70-87) and C-ter (231-232) unobserved in the electron density (coverage 59%).
- 6iqt: CagV from *Helicobacter pylori*; Uniprot: O25265; Crystallized sequence: 74-229; N-ter (74-85), loop  $\beta$ 3- $\beta$ 4 (202-209) and C-ter (229) unobserved in the electron density (coverage 51%).
- 6zgn: OrfG from *Streptococcus thermophilus*; Uniprot: Q70CA4; Crystallized sequence: 65-204; N-ter (65-91), loop before  $\beta$ 1 (134-138) and loop  $\beta$ 2- $\beta$ 3 (169-175) unobserved in the electron density (coverage 31%).

**Table S2a: Sequence comparison**

|      |                            | Gram-negative VirB8   |                       |                       |                       |                       |                       |                       |                       |                       |                       |                       |                       | Gram-positive VirB8-like |                       |                       |                       |                      |  |  |
|------|----------------------------|-----------------------|-----------------------|-----------------------|-----------------------|-----------------------|-----------------------|-----------------------|-----------------------|-----------------------|-----------------------|-----------------------|-----------------------|--------------------------|-----------------------|-----------------------|-----------------------|----------------------|--|--|
|      |                            | Class I <sup>-</sup>  |                       |                       |                       | Class II <sup>-</sup> |                       |                       |                       |                       |                       |                       |                       | Class III <sup>-</sup>   |                       |                       |                       | Class I <sup>+</sup> |  |  |
|      |                            | 5i97                  | 4akz                  | 4nhf                  | 4jf8                  | 4mei                  | 4kz1                  | 4lso                  | 2cc3                  | 6iqt                  | 4o3v                  | 3wz4                  | 3wz3                  | 5cnl                     | 6zgn                  | 3ub1                  | 4ec6                  | 5aiw                 |  |  |
| 5i97 | length<br>ident.<br>simil. | 143<br>1<br>1         |                       |                       |                       |                       |                       |                       |                       |                       |                       |                       |                       |                          |                       |                       |                       |                      |  |  |
| 4akz | length<br>ident.<br>simil. | 145<br>0.414<br>0.586 | 138<br>1<br>1         |                       |                       |                       |                       |                       |                       |                       |                       |                       |                       |                          |                       |                       |                       |                      |  |  |
| 4nhf | length<br>ident.<br>simil. | 149<br>0.383<br>0.557 | 148<br>0.419<br>0.534 | 144<br>1<br>1         |                       |                       |                       |                       |                       |                       |                       |                       |                       |                          |                       |                       |                       |                      |  |  |
| 4jf8 | length<br>ident.<br>simil. | 150<br>0.367<br>0.573 | 149<br>0.422<br>0.564 | 145<br>0.976<br>0.924 | 144<br>1<br>1         |                       |                       |                       |                       |                       |                       |                       |                       |                          |                       |                       |                       |                      |  |  |
| 4mei | length<br>ident.<br>simil. | 150<br>0.200<br>0.413 | 145<br>0.338<br>0.51  | 149<br>0.282<br>0.456 | 150<br>0.287<br>0.473 | 136<br>1<br>1         |                       |                       |                       |                       |                       |                       |                       |                          |                       |                       |                       |                      |  |  |
| 4kz1 | length<br>ident.<br>simil. | 149<br>0.215<br>0.436 | 144<br>0.340<br>0.535 | 149<br>0.295<br>0.456 | 150<br>0.300<br>0.473 | 136<br>0.956<br>0.971 | 135<br>1<br>1         |                       |                       |                       |                       |                       |                       |                          |                       |                       |                       |                      |  |  |
| 4lso | length<br>ident.<br>simil. | 152<br>0.204<br>0.454 | 150<br>0.300<br>0.493 | 150<br>0.253<br>0.460 | 151<br>0.265<br>0.477 | 141<br>0.837<br>0.879 | 141<br>0.837<br>0.894 | 141<br>1<br>1         |                       |                       |                       |                       |                       |                          |                       |                       |                       |                      |  |  |
| 2cc3 | length<br>ident.<br>simil. | 157<br>0.248<br>0.331 | 153<br>0.242<br>0.279 | 158<br>0.241<br>0.261 | 159<br>0.233<br>0.346 | 146<br>0.240<br>0.425 | 146<br>0.240<br>0.425 | 151<br>0.219<br>0.431 | 144<br>1<br>1         |                       |                       |                       |                       |                          |                       |                       |                       |                      |  |  |
| 6iqt | length<br>ident.<br>simil. | 154<br>0.091<br>0.227 | 151<br>0.139<br>0.258 | 157<br>0.134<br>0.280 | 158<br>0.139<br>0.279 | 151<br>0.133<br>0.265 | 150<br>0.133<br>0.267 | 155<br>0.136<br>0.252 | 157<br>0.115<br>0.274 | 135<br>1<br>1         |                       |                       |                       |                          |                       |                       |                       |                      |  |  |
| 4o3v | length<br>ident.<br>simil. | 163<br>0.147<br>0.282 | 158<br>0.196<br>0.310 | 163<br>0.172<br>0.319 | 164<br>0.195<br>0.335 | 152<br>0.151<br>0.265 | 152<br>0.145<br>0.322 | 156<br>0.160<br>0.308 | 156<br>0.186<br>0.333 | 138<br>1<br>1         |                       |                       |                       |                          |                       |                       |                       |                      |  |  |
| 3wz4 | length<br>ident.<br>simil. | 165<br>0.091<br>0.249 | 161<br>0.093<br>0.248 | 165<br>0.091<br>0.285 | 166<br>0.102<br>0.295 | 154<br>0.104<br>0.292 | 153<br>0.085<br>0.288 | 158<br>0.089<br>0.272 | 163<br>0.074<br>0.282 | 154<br>0.104<br>0.266 | 162<br>0.062<br>0.235 | 137<br>1<br>1         |                       |                          |                       |                       |                       |                      |  |  |
| 3wz3 | length<br>ident.<br>simil. | 166<br>0.042<br>0.187 | 161<br>0.081<br>0.205 | 165<br>0.097<br>0.206 | 166<br>0.054<br>0.175 | 154<br>0.091<br>0.260 | 153<br>0.084<br>0.261 | 159<br>0.076<br>0.245 | 163<br>0.074<br>0.227 | 155<br>0.058<br>0.187 | 161<br>0.037<br>0.199 | 139<br>0.266<br>0.453 | 137<br>1<br>1         |                          |                       |                       |                       |                      |  |  |
| 5cnl | length<br>ident.<br>simil. | 169<br>0.112<br>0.231 | 164<br>0.110<br>0.226 | 167<br>0.132<br>0.252 | 168<br>0.125<br>0.262 | 157<br>0.096<br>0.236 | 157<br>0.096<br>0.255 | 161<br>0.099<br>0.248 | 166<br>0.060<br>0.217 | 158<br>0.101<br>0.234 | 164<br>0.073<br>0.220 | 148<br>0.264<br>0.432 | 149<br>0.134<br>0.322 | 139<br>1<br>1            |                       |                       |                       |                      |  |  |
| 6zgn | length<br>ident.<br>simil. | 152<br>0.059<br>0.197 | 147<br>0.068<br>0.204 | 153<br>0.059<br>0.177 | 153<br>0.072<br>0.170 | 145<br>0.062<br>0.172 | 144<br>0.063<br>0.181 | 150<br>0.053<br>0.160 | 153<br>0.059<br>0.163 | 145<br>0.076<br>0.186 | 149<br>0.060<br>0.168 | 144<br>0.056<br>0.188 | 144<br>0.069<br>0.208 | 146<br>0.062<br>0.164    | 101<br>1<br>1         |                       |                       |                      |  |  |
| 3ub1 | length<br>ident.<br>simil. | 169<br>0.041<br>0.189 | 165<br>0.042<br>0.188 | 171<br>0.035<br>0.164 | 171<br>0.041<br>0.175 | 163<br>0.080<br>0.178 | 162<br>0.086<br>0.185 | 168<br>0.083<br>0.173 | 170<br>0.035<br>0.171 | 158<br>0.101<br>0.203 | 165<br>0.042<br>0.182 | 159<br>0.063<br>0.182 | 159<br>0.063<br>0.201 | 160<br>0.063<br>0.181    | 127<br>0.095<br>0.323 | 122<br>1<br>1         |                       |                      |  |  |
| 4ec6 | length<br>ident.<br>simil. | 158<br>0.051<br>0.190 | 153<br>0.046<br>0.206 | 157<br>0.045<br>0.153 | 157<br>0.051<br>0.159 | 151<br>0.046<br>0.166 | 150<br>0.047<br>0.167 | 155<br>0.032<br>0.155 | 159<br>0.038<br>0.182 | 147<br>0.088<br>0.218 | 155<br>0.039<br>0.194 | 146<br>0.055<br>0.240 | 146<br>0.089<br>0.206 | 147<br>0.075<br>0.197    | 114<br>0.105<br>0.290 | 129<br>0.109<br>0.256 | 109<br>1<br>1         |                      |  |  |
| 5aiw | length<br>ident.<br>simil. | 165<br>0.067<br>0.200 | 161<br>0.087<br>0.193 | 166<br>0.108<br>0.217 | 167<br>0.096<br>0.198 | 158<br>0.063<br>0.203 | 157<br>0.064<br>0.204 | 162<br>0.056<br>0.191 | 167<br>0.066<br>0.186 | 154<br>0.065<br>0.175 | 161<br>0.118<br>0.236 | 154<br>0.065<br>0.214 | 155<br>0.071<br>0.232 | 159<br>0.031<br>0.195    | 141<br>0.028<br>0.177 | 155<br>0.077<br>0.200 | 144<br>0.049<br>0.208 | 128<br>1<br>1        |  |  |

**Table S2b : TM-scores**

|      | Gram-negative VirB8  |        |        |        |                       |        |        |        |                        |        |        |        |        |        | Gram-positive VirB8-like |       |      |  |
|------|----------------------|--------|--------|--------|-----------------------|--------|--------|--------|------------------------|--------|--------|--------|--------|--------|--------------------------|-------|------|--|
|      | Class I <sup>-</sup> |        |        |        | Class II <sup>-</sup> |        |        |        | Class III <sup>-</sup> |        |        |        |        |        | Class I <sup>+</sup>     |       |      |  |
|      | 5i97                 | 4akz   | 4nhf   | 4jf8   | 4mei                  | 4kz1   | 4lso   | 3cc3   | 6iqt                   | 4o3v   | 3wz4   | 3wz3   | 5cnl   | 6zgn   | 3ub1                     | 4ec6  | 5aiw |  |
| 5i97 | 1                    |        |        |        |                       |        |        |        |                        |        |        |        |        |        |                          |       |      |  |
| 4akz | 0.9167               | 1      |        |        |                       |        |        |        |                        |        |        |        |        |        |                          |       |      |  |
| 4nhf | 0.8942               | 0.9071 | 1      |        |                       |        |        |        |                        |        |        |        |        |        |                          |       |      |  |
| 4jf8 | 0.893                | 0.9259 | 0.9438 | 1      |                       |        |        |        |                        |        |        |        |        |        |                          |       |      |  |
| 4mei | 0.8768               | 0.8754 | 0.8789 | 0.8699 | 1                     |        |        |        |                        |        |        |        |        |        |                          |       |      |  |
| 4kz1 | 0.8854               | 0.8842 | 0.879  | 0.8748 | 0.9948                | 1      |        |        |                        |        |        |        |        |        |                          |       |      |  |
| 4lso | 0.8665               | 0.8619 | 0.878  | 0.8702 | 0.9819                | 0.984  | 1      |        |                        |        |        |        |        |        |                          |       |      |  |
| 2cc3 | 0.825                | 0.8901 | 0.8365 | 0.838  | 0.9123                | 0.9154 | 0.883  | 1      |                        |        |        |        |        |        |                          |       |      |  |
| 6iqt | 0.8129               | 0.8043 | 0.8053 | 0.7898 | 0.8311                | 0.8298 | 0.8377 | 0.8139 | 1                      |        |        |        |        |        |                          |       |      |  |
| 4o3v | 0.7696               | 0.7971 | 0.8158 | 0.7971 | 0.8208                | 0.8247 | 0.8242 | 0.8326 | 0.784                  | 1      |        |        |        |        |                          |       |      |  |
| 3wz4 | 0.7218               | 0.7233 | 0.7432 | 0.7402 | 0.7669                | 0.7691 | 0.7674 | 0.7462 | 0.7733                 | 0.739  | 1      |        |        |        |                          |       |      |  |
| 3wz3 | 0.7054               | 0.7159 | 0.7391 | 0.7371 | 0.7257                | 0.7291 | 0.7221 | 0.7282 | 0.7408                 | 0.7414 | 0.8873 | 1      |        |        |                          |       |      |  |
| 5cnl | 0.7108               | 0.7177 | 0.7397 | 0.7324 | 0.7519                | 0.75   | 0.7468 | 0.7258 | 0.7738                 | 0.7559 | 0.8823 | 0.8142 | 1      |        |                          |       |      |  |
| 6zgn | 0.733                | 0.7587 | 0.7454 | 0.7442 | 0.743                 | 0.7445 | 0.7426 | 0.7586 | 0.7462                 | 0.7548 | 0.7725 | 0.7626 | 0.7655 | 1      |                          |       |      |  |
| 3ub1 | 0.6146               | 0.6399 | 0.6202 | 0.6237 | 0.6259                | 0.6266 | 0.6342 | 0.6268 | 0.6432                 | 0.656  | 0.6907 | 0.6641 | 0.6714 | 0.8122 | 1                        |       |      |  |
| 4ec6 | 0.6871               | 0.7121 | 0.7052 | 0.715  | 0.7119                | 0.7081 | 0.7212 | 0.6703 | 0.7231                 | 0.6991 | 0.7363 | 0.716  | 0.7169 | 0.8057 | 0.7764                   | 1     |      |  |
| 5aiw | 0.6882               | 0.6891 | 0.7054 | 0.6988 | 0.6775                | 0.6757 | 0.6976 | 0.6962 | 0.7257                 | 0.7022 | 0.7033 | 0.7047 | 0.678  | 0.7036 | 0.6537                   | 0.656 | 1    |  |

**Table S2c: rmsd (Å)**

|      | Gram-negative VirB8  |       |       |       |                       |       |       |       |                        |       |       |       |       |       | Gram-positive VirB8-like |      |      |  |
|------|----------------------|-------|-------|-------|-----------------------|-------|-------|-------|------------------------|-------|-------|-------|-------|-------|--------------------------|------|------|--|
|      | Class I <sup>-</sup> |       |       |       | Class II <sup>-</sup> |       |       |       | Class III <sup>-</sup> |       |       |       |       |       | Class I <sup>+</sup>     |      |      |  |
|      | 5i97                 | 4akz  | 4nhf  | 4jf8  | 4mei                  | 4kz1  | 4lso  | 3cc3  | 6iqt                   | 4o3v  | 3wz4  | 3wz3  | 5cnl  | 6zgn  | 3ub1                     | 4ec6 | 5aiw |  |
| 5i97 | 0                    |       |       |       |                       |       |       |       |                        |       |       |       |       |       |                          |      |      |  |
| 4akz | 1.426                | 0     |       |       |                       |       |       |       |                        |       |       |       |       |       |                          |      |      |  |
| 4nhf | 1.628                | 1.631 | 0     |       |                       |       |       |       |                        |       |       |       |       |       |                          |      |      |  |
| 4jf8 | 1.56                 | 1.525 | 1.316 | 0     |                       |       |       |       |                        |       |       |       |       |       |                          |      |      |  |
| 4mei | 2.059                | 1.837 | 1.738 | 1.812 | 0                     |       |       |       |                        |       |       |       |       |       |                          |      |      |  |
| 4kz1 | 2.062                | 1.818 | 1.754 | 1.758 | 0.326                 | 0     |       |       |                        |       |       |       |       |       |                          |      |      |  |
| 4lso | 2.133                | 1.86  | 1.969 | 2.015 | 0.602                 | 0.562 | 0     |       |                        |       |       |       |       |       |                          |      |      |  |
| 2cc3 | 2.128                | 1.503 | 1.996 | 2.114 | 1.483                 | 1.416 | 1.704 | 0     |                        |       |       |       |       |       |                          |      |      |  |
| 6iqt | 2.286                | 2.013 | 2.256 | 2.505 | 1.513                 | 1.395 | 1.738 | 1.979 | 0                      |       |       |       |       |       |                          |      |      |  |
| 4o3v | 2.942                | 2.172 | 2.495 | 2.465 | 2.061                 | 2     | 2.348 | 2.488 | 2.037                  | 0     |       |       |       |       |                          |      |      |  |
| 3wz4 | 3.108                | 2.843 | 2.687 | 2.628 | 2.096                 | 2.103 | 2.134 | 2.456 | 2.408                  | 2.379 | 0     |       |       |       |                          |      |      |  |
| 3wz3 | 3.179                | 2.95  | 2.694 | 2.715 | 2.799                 | 2.82  | 2.84  | 2.759 | 2.77                   | 2.638 | 1.691 | 0     |       |       |                          |      |      |  |
| 5cnl | 3.045                | 2.823 | 2.902 | 3.152 | 2.301                 | 2.301 | 2.475 | 2.814 | 2.498                  | 2.452 | 1.631 | 2.161 | 0     |       |                          |      |      |  |
| 6zgn | 2.704                | 2.444 | 2.605 | 2.62  | 2.401                 | 2.402 | 2.411 | 2.314 | 2.359                  | 2.33  | 2.262 | 2.393 | 2.399 | 0     |                          |      |      |  |
| 3ub1 | 3.362                | 3.271 | 3.675 | 3.415 | 3.312                 | 3.248 | 3.332 | 3.263 | 3.219                  | 3.002 | 2.849 | 3.18  | 3.042 | 1.99  | 0                        |      |      |  |
| 4ec6 | 2.841                | 2.718 | 2.939 | 2.767 | 2.691                 | 2.673 | 2.558 | 3.114 | 2.762                  | 2.757 | 2.599 | 2.939 | 2.97  | 1.878 | 2.301                    | 0    |      |  |
| 5aiw | 2.943                | 2.777 | 2.931 | 2.888 | 2.774                 | 2.757 | 2.852 | 2.997 | 2.774                  | 3.13  | 2.939 | 2.863 | 3.034 | 2.474 | 2.637                    | 3.12 | 0    |  |

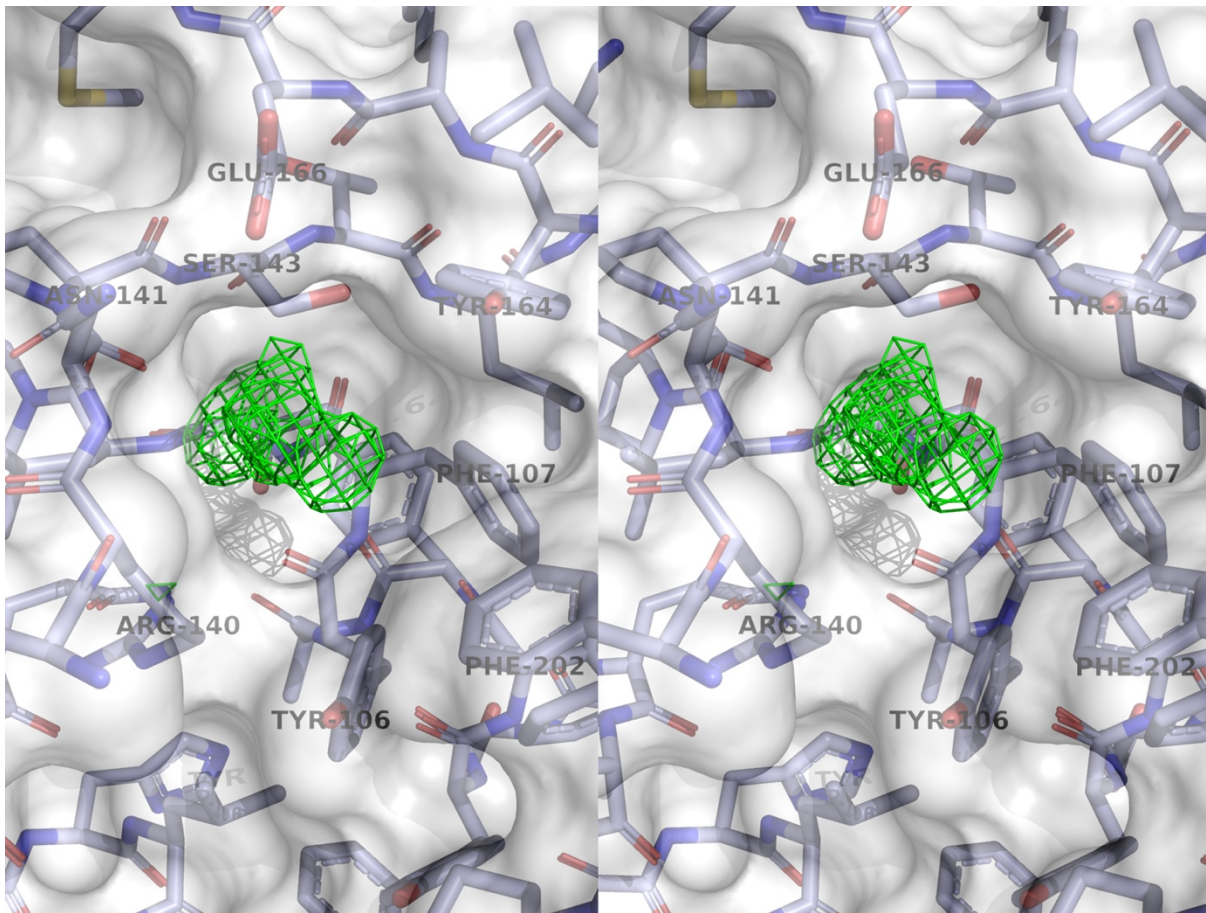

**Figure S1: Presence of an unknown ligand bound to OrfG<sub>64-204</sub>.** Stereo view of an unattributed blob of electron density observed in the Fo-Fc map contoured at  $+3\sigma$ . Surrounding amino acids are shown in sticks and labeled.

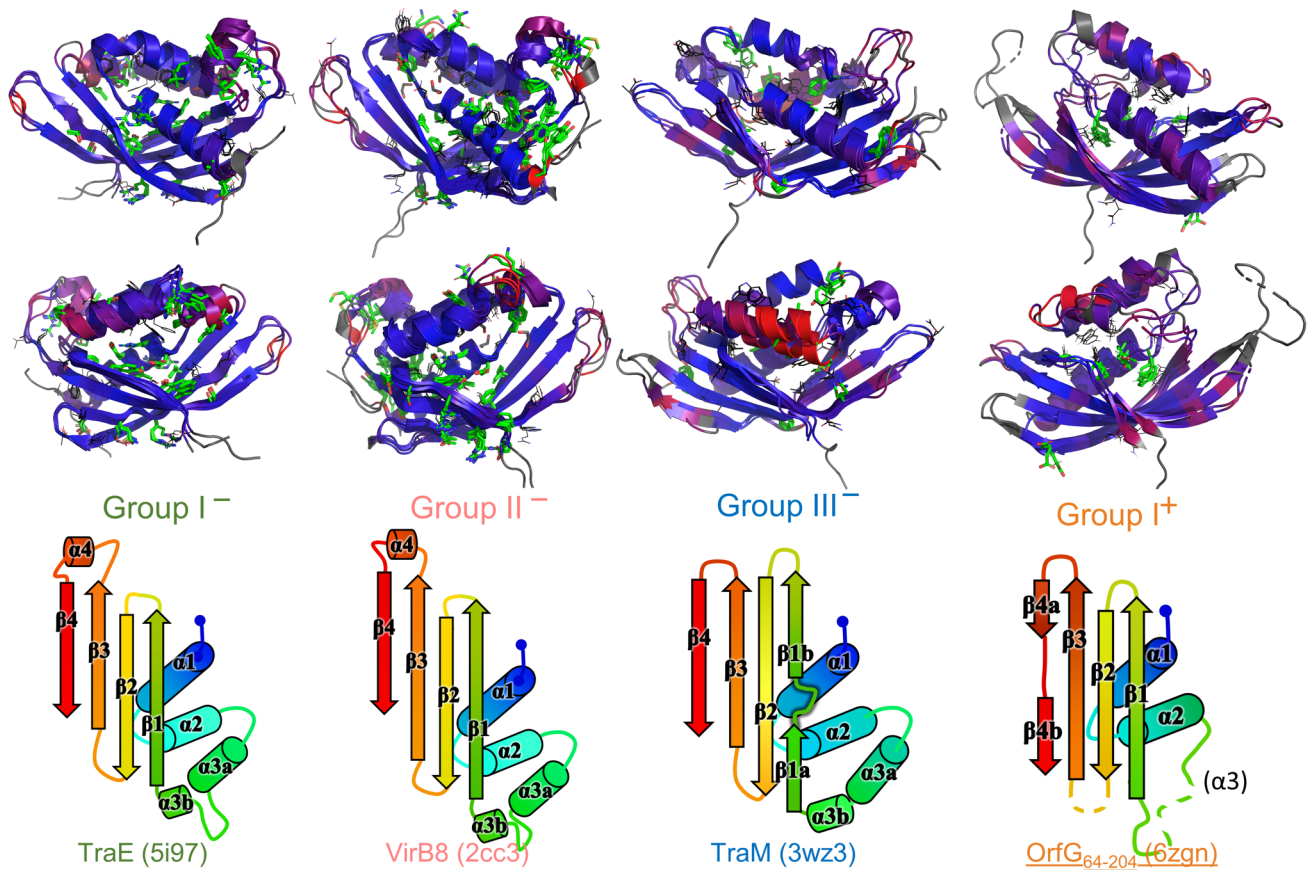

**Figure S2: Superposition of VirB8-like structures within each class identified in the structural tree.** Structures were superposed by mTM-Align, and represented using the same color code as in Figure 3 (see also Materials and Methods). Amino acid sidechains that are conserved are shown in green sticks, those that share a similar nature within a class are drawn as black lines. For each class, front view, rear view and secondary structure topology of a representative member are shown vertically.

## References:

Dong R, Peng Z, Zhang Y & Yang J (2018) mTM-align: an algorithm for fast and accurate multiple protein structure alignment. *Bioinformatics* **34**: 1719-1725.

Dong R, Pan S, Peng Z, Zhang Y & Yang J (2018) mTM-align: a server for fast protein structure database search and multiple protein structure alignment. *Nucleic Acids Res* **46**: W380-W386.
